# Supplementary material
Source: Royal Society of Chemistry journal article supplement (doi:10.1039/d6py00348f)
Supplement: d6py00348f1.pdf [file d6py00348f1.pdf]

## Electronic Supplementary Information

### **Cellodextrin phosphorylase-catalyzed enzymatic polymerization from primers modified on poly( $\gamma$ -glutamic acid) for the synthesis of moderate-molecular-weight celluloses**

Kousuke Ohba<sup>1</sup>, Mimi Tokunaga<sup>1</sup>, Masayasu Totani<sup>1</sup>, and Jun-ichi Kadokawa<sup>1,\*</sup>

<sup>1</sup> Graduate School of Science and Engineering, Kagoshima University, 1-21-40 Korimoto, Kagoshima 890-0065, Japan

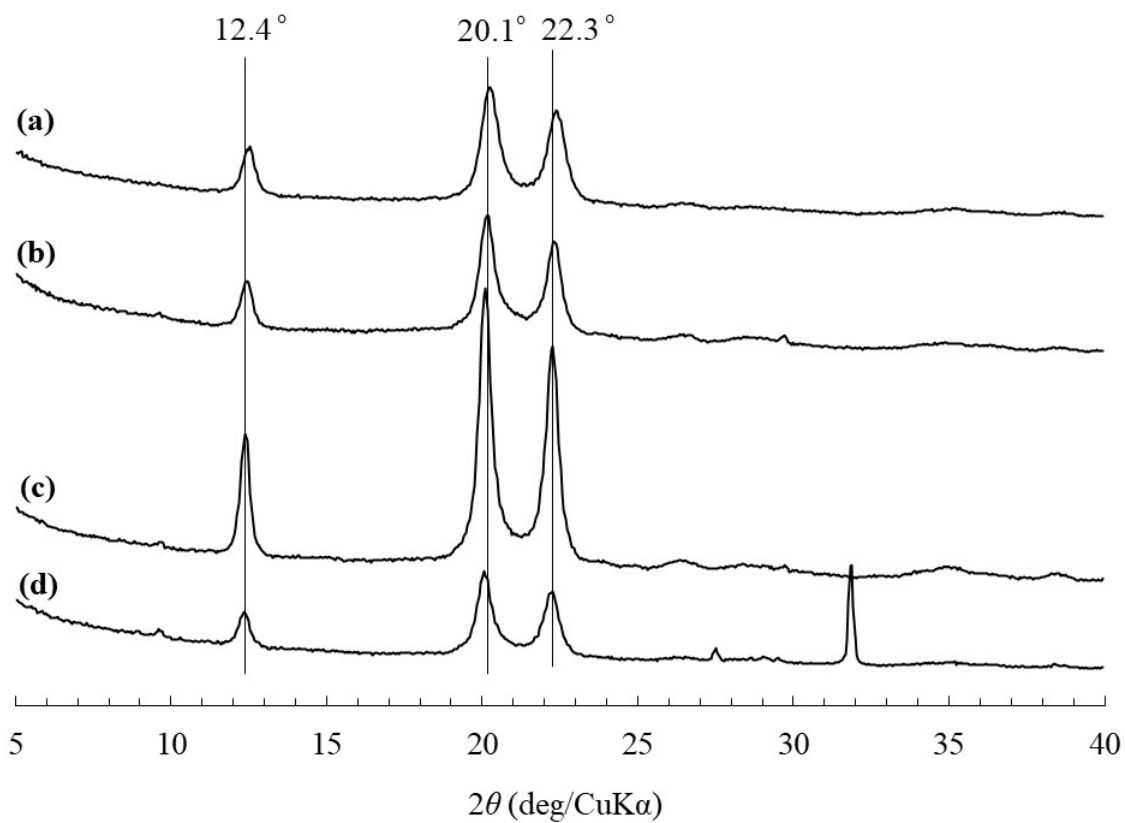

**Fig. S1.** XRD profiles of (a-c) cellulose-grafted PGAs of entries 1-3 in Table 1 and (d) isolated cellulose.

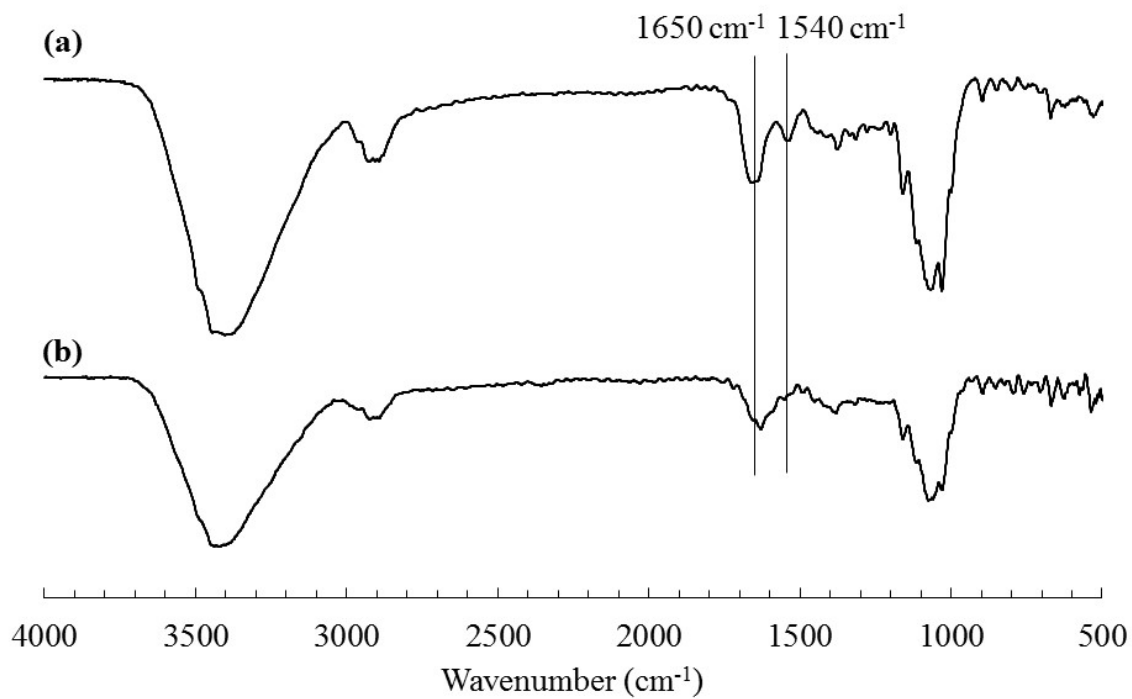

**Fig. S2.** IR spectra of (a) cellulose-grafted PGA of entry 2 in Table 1 and isolated cellulose.
